# Supplementary material
Source: HighWire-hosted journal article supplement (http://www.qdcxjkg.com/highwire/filestream/114132/field_highwire_adjunct_files/0/ERJ-00912-2012_Disclosures.pdf)
Supplement: ERJ-00912-2012_Disclosures.pdf [file ERJ-00912-2012_Disclosures.pdf]

**K. Boutet:** has received \$1000-1500 fees from Actelion and Pfizer for speaking to different groups of colleagues on Pulmonary Hypertension in general.

**L. Rudski:** has received fees for organising education: fundraising from pharmaceutical and echocardiography companies (15 in total) to conduct an annual cardiac imaging symposium. All funds deposited into a research account to cover only the expenses.

**R. Schlesinger:** had summer-student employment with Imperial Tobacco Canada in the 1970s and is an officer of a private corporation that holds stocks in excess of 10000 USD in Altria Group Inc.
